# Supplementary material for: Diastereoselective synthesis of furopyranopyridine in ionic liquid/water without additional catalyst
Source: Royal Society of Chemistry journal article supplement (doi:10.1039/c3ra42159g), 2013-01-01
Supplement: c3ra42159g.pdf [file c3ra42159g.pdf]

## **Supplementary Information**

**for**

### **Diastereoselective synthesis of fuopyranopyridine in ionic-liquid/water without additional catalyst**

Ibadur R. Siddiqui, Shayna Shamim, Malik A.Waseem, Arjita Srivastava and Rahila

Laboratory of Green Synthesis, Department of Chemistry, University of Allahabad, Allahabad, India-  
211002; Email: dr.irsiddiqui@gmail.com

#### **Table of Content**

|                                                 |     |
|-------------------------------------------------|-----|
| 1. Experimental Section& General Procedure..... | 2   |
| 2. Spectral Data.....                           | 2-5 |

## Experimental

All chemicals used were of reagent grade and used as received without further purification. Melting points were determined in an open glass capillary method and are uncorrected. <sup>1</sup>H-NMR spectra were recorded at 400 MHz and <sup>13</sup>C-NMR Spectra at 100 MHz on a Bruker Avance DPX FT spectrometer in CDCl<sub>3</sub> using TMS as an internal reference. Mass spectra were determined on a JEOL SX-102 (FAB) mass spectrometer at 70eV. Elemental analysis was carried out using a Coleman automatic C, H and N analyser. The progress of the reaction was monitored by TLC (Merck silica gel).

### General procedure for the synthesis of furopyranopyridine

A mixture of *N*-Methylpiperidin-4-one (10 mmol), aldehyde (10 mmol), and 2,3-dihydrofuran (20 mmol) in [bmim]BF<sub>4</sub> (1 mL)/H<sub>2</sub>O (1 mL) was stirred at room temperature for an 25-30 min (**Table 3**). After completion of the reaction, as indicated by TLC, the reaction mixture was washed with diethyl ether (3x10 mL). The combined ether extracts were concentrated in vacuum and the resulting product was directly charged on silica gel column and eluted with a mixture of ethyl acetate/n-hexane (2:7) to afford pure product **4(a-j)**. The remaining ionic liquid was rinsed with ether (2 ml), dried under vacuum at 90°C for 2 h to eliminate any water trapped and reused for subsequent runs.

### SPECTRAL DATA

**4a. 8-Benzylidene-6-methyl-4-phenyl-2,3,3a,5,6,7,8,9a-octa-hydro-4H-1,9-dioxa-6-aza-cyclopenta[b]naphthalene**  
m.p. 146-148°C

<sup>1</sup>H-NMR (400 MHz): δ 1.81 (m, 2H, 3-CH<sub>2</sub>), 2.27 (s, 3H, NCH<sub>3</sub>), 2.56 (m, *J* = 3.9 Hz, 1H, 3a-CH), 3.03 (s, 4H, 5,7-CH<sub>2</sub>), 3.17 (d, *J* = 4.0 Hz, 1H, 4-CH), 3.75 (t, 2H, 2-CH<sub>2</sub>), 5.74 (s, *J* = 4.0 Hz, 1H, 9a-CH), 6.57 (s, 1H, =CH), 7.08-7.30 (m, 10H, Ar)

<sup>13</sup>CNMR (100 MHz): δ 22.7, 29.8, 39.9, 43.6, 53.8, 54.1, 60.5, 104.3, 104.8, 120.4, 125.7, 126.2, 127.6, 128.1, 128.2, 128.4, 134.9, 136.8, 139.4, 147.5

MS *m/z*: 359 (M<sup>+</sup>),

Anal. calcd. for C<sub>24</sub>H<sub>25</sub>NO<sub>2</sub>: C, 80.19; H, 7.01; N, 3.90 %; Found C, 80.25; H, 7.06; N, 3.96%

**4b. 6-Methyl-8-(4-nitrobenzylidene)-4-(4-nitrophenyl)-2,3,3a,5,6,7,8,9a-octahydro-4H-1,9-dioxa-6-aza-cyclopenta[b]naphthalene**

m.p. 174-175°C

<sup>1</sup>H-NMR (400 MHz): δ 1.81 (m, 2H, 3-CH<sub>2</sub>), 2.27 (s, 3H, NCH<sub>3</sub>), 2.56 (m, *J* = 3.9 Hz, 1H, 3a-CH), 3.03 (s, 4H, 5,7-CH<sub>2</sub>), 3.17 (d, *J* = 3.9 Hz, 1H, 4-CH), 3.75 (t, 2H, 2-CH<sub>2</sub>), 5.74 (s, *J* = 4.0 Hz, 1H, 9a-CH), 6.71 (s, 1H, =CH), 7.38-8.14 (m, 8H, Ar)

<sup>13</sup>CNMR (100 MHz): δ 22.7, 29.8, 39.9, 43.6, 53.8, 54.1, 60.5, 104.3, 104.8, 120.4, 123.4, 123.5, 127.1, 129.2, 136.8, 141.0, 145.5, 145.6, 147.5, 147.6

MS *m/z*: 449 (M<sup>+</sup>)

Anal. calcd. for  $C_{24}H_{23}N_3O_6$ : C, 64.13; H, 5.16; N, 9.35 %; Found: C, 64.21; H, 5.11; N, 9.39 %.

**4c. 8-(4-Chlorobenzylidene)-4-(4-chlorophenyl)-6-methyl-2,3,3a,5,6,7,8,9a-octahydro-4H-1,9-dioxo-6-aza-cyclopenta[b] naphthalene**

m.p. 158-160°C

$^1\text{H-NMR}$  (400 MHz):  $\delta$  1.81 (m, 2H, 3-CH<sub>2</sub>), 2.27 (s, 3H, NCH<sub>3</sub>), 2.56 (m,  $J$  = 3.9 Hz, 1H, 3a-CH), 3.03 (s, 4H, 5,7-CH<sub>2</sub>), 3.17 (d,  $J$  = 4.0 Hz, 1H, 4-CH), 3.75 (t, 2H, 2-CH<sub>2</sub>), 5.74 (s,  $J$  = 3.9 Hz, 1H, 9a-CH), 6.57 (s, 1H, =CH), 7.06-7.24 (m, 8H, Ar)

$^{13}\text{CNMR}$  (100 MHz):  $\delta$  22.7, 29.8, 39.9, 43.6, 53.8, 54.1, 60.5, 104.3, 104.8, 120.4, 127.6, 128.7, 128.8, 129.7, 131.0, 133.0, 133.0, 137.5, 136.8, 147.5

MS  $m/z$ : 427 ( $M^+$ )

Anal. calcd. for  $C_{24}H_{23}Cl_2NO_2$ : C, 67.29; H, 5.41; N, 3.27 %; Found: C, 67.36; H, 5.47; N, 3.33%.

**4d. 6-Methyl-8-(4-methylbenzylidene)-4-p-tolyl-2,3,3a,5,6,7,8,9a-octahydro-4H-1,9-dioxo-6-aza-cyclopenta[b] naphthalene**

m.p. 111-113°C

$^1\text{H-NMR}$  (400 MHz):  $\delta$  1.81 (m, 2H, 3-CH<sub>2</sub>), 2.27 (s, 3H, NCH<sub>3</sub>), 2.35 (s, 6H, CH<sub>3</sub>), 2.56 (m,  $J$  = 4.0 Hz, 1H, 3a-CH), 3.03 (s, 4H, 5,7-CH<sub>2</sub>), 3.17 (d,  $J$  = 3.9 Hz, 1H, 4-CH), 3.75 (t, 2H, 2-CH<sub>2</sub>), 5.74 (s,  $J$  = 3.9 Hz, 1H, 9a-CH), 6.57 (s, 1H, =CH), 7.00-7.18 (m, 8H, Ar)

$^{13}\text{CNMR}$  (100 MHz):  $\delta$  20.8, 22.7, 29.8, 39.9, 43.6, 53.8, 54.1, 60.5, 104.3, 104.8, 120.4, 126.1, 128.2, 129.0, 129.1, 131.9, 134.9, 136.4, 136.8, 136.9, 147.5

MS  $m/z$ : 387 ( $M^+$ )

Anal. calcd. for  $C_{26}H_{29}NO_2$ : C, 80.59; H, 7.54; N, 3.61 %; Found: C, 80.65; H, 7.58; N, 3.68%.

**4e. 8-(4-Methoxybenzylidene)-4-(4-methoxyphenyl)-6-methyl-2,3,3a,5,6,7,8,9a-octahydro-4H-1,9-dioxo-6-aza-cyclopenta[b]naphthaene**

m.p.: 102-103°C

$^1\text{H-NMR}$  (400 MHz):  $\delta$  1.81 (m, 2H, 3-CH<sub>2</sub>), 2.27 (s, 3H, NCH<sub>3</sub>), 2.56 (m,  $J$  = 3.9 Hz, 1H, 3a-CH), 3.03 (s, 4H, 5,7-CH<sub>2</sub>), 3.17 (d,  $J$  = 4.0 Hz, 1H, 4-CH), 3.73 (s, 6H, OCH<sub>3</sub>), 3.75 (t, 2H, 2-CH<sub>2</sub>), 5.74 (s,  $J$  = 4.0 Hz, 1H, 9a-CH), 6.57 (s, 1H, =CH), 6.72-7.19 (m, 8H, Ar)

$^{13}\text{CNMR}$  (100 MHz):  $\delta$  22.7, 29.8, 39.9, 43.6, 53.8, 54.1, 56.1, 60.5, 104.3, 104.8, 113.9, 114.0, 120.4, 127.2, 127.3, 129.3, 131.7, 136.8, 147.5, 159.2, 161.2

MS  $m/z$ : 419 ( $M^+$ )

Anal. calcd. for  $C_{26}H_{29}NO_4$ : C, 74.44; H, 6.97; N, 3.34 %; Found: C, 74.51; H, 7.01; N, 3.38%.

**4f. 8-(4-Hydroxybenzylidene)-4-(4-hydroxyphenyl)-6-methyl-2,3,3a,5,6,7,8,9a-octa-hydro-4H-1,9-dioxo-6-aza-cyclopenta[b]naphthalene**

m.p. 189-191°C

<sup>1</sup>H-NMR (400 MHz): δ 1.81 (m, 2H, 3-CH<sub>2</sub>), 2.27 (s, 3H, NCH<sub>3</sub>), 2.56 (m, *J* = 3.9 Hz, 1H, 3a-CH), 3.03 (s, 4H, 5,7-CH<sub>2</sub>), 3.17 (d, *J* = 4.0 Hz, 1H, 4-CH), 3.75 (t, 2H, 2-CH<sub>2</sub>), 5.0 (s, 2H, OH, exchangeable with D<sub>2</sub>O), 5.74 (s, *J* = 3.9 Hz, 1H, 9a-CH), 6.57 (s, 1H, =CH), 6.68-7.13 (m, 8H, Ar)

<sup>13</sup>CNMR (100 MHz): δ 22.7, 29.8, 39.9, 43.6, 53.8, 54.1, 60.5, 104.3, 104.8, 115.5, 115.6, 120.4, 127.5, 127.6, 129.7, 132.0, 136.8, 147.5, 154.5, 156.5

MS *m/z*: 391 (M<sup>+</sup>)

Anal. calcd. for C<sub>24</sub>H<sub>25</sub>NO<sub>4</sub>: C, 73.64; H, 6.44; N, 3.58 %; Found C, 73.70; H, 6.49; N, 3.63%.

**4g. 6-Methyl-8-(3-nitrobenzylidene)-4-(3-nitrophenyl)-2,3,3a,5,6,7,8,9a-octahydro-4H-1,9-dioxo-6-aza-cyclopenta[b]naphthalene**

m.p. 201-203°C

<sup>1</sup>H-NMR (400 MHz): δ 1.81 (m, 2H, 3-CH<sub>2</sub>), 2.27 (s, 3H, NCH<sub>3</sub>), 2.56 (m, *J* = 4.0 Hz, 1H, 3a-CH), 3.03 (s, 4H, 5,7-CH<sub>2</sub>), 3.17 (d, *J* = 4.0 Hz, 1H, 4-CH), 3.75 (t, 2H, 2-CH<sub>2</sub>), 5.74 (s, *J* = 3.9 Hz, 1H, 9a-CH), 6.68 (s, 1H, =CH), 7.47-8.23 (m, 8H, Ar)

<sup>13</sup>CNMR (100 MHz): δ 22.7, 28.8, 39.9, 43.6, 53.8, 54.1, 60.5, 104.3, 104.8, 120.4, 120.8, 121.3, 122.8, 123.4, 129.2, 129.3, 132.3, 134.4, 135.8, 136.8, 140.3, 147.5, 148.2, 148.3

MS *m/z*: 449 (M<sup>+</sup>)

Anal. calcd. for C<sub>24</sub>H<sub>23</sub>N<sub>3</sub>O<sub>6</sub>: C, 64.13; H, 5.16; N, 9.35 %; Found C, 64.19; H, 5.20; N, 9.39%

**4h. 8-(3,4-Dimethoxybenzylidene)-4-(3,4-dimethoxyphenyl)-6-methyl-2,3,3a,5,6,7,8,9a-octahydro-4H-1,9-dioxo-6-aza-cyclopenta[b]naphthalene**

m.p. 178-180°C

<sup>1</sup>H-NMR (400 MHz): δ 1.81 (m, 2H, 3-CH<sub>2</sub>), 2.27 (s, 3H, NCH<sub>3</sub>), 2.56 (m, *J* = 4.0 Hz, 1H, 3a-CH), 3.03 (s, 4H, 5,7-CH<sub>2</sub>), 3.17 (d, *J* = 3.9 Hz, 1H, 4-CH), 3.73 (s, 12H, OCH<sub>3</sub>), 3.75 (t, 2H, 2-CH<sub>2</sub>), 5.74 (s, *J* = 3.9 Hz, 1H, 9a-CH), 6.57 (s, 1H, =CH), 6.52-6.75 (m, 6H, Ar)

<sup>13</sup>CNMR (100 MHz): δ 22.7, 30.1, 39.9, 43.6, 53.8, 54.1, 56.2, 60.5, 104.3, 104.8, 112.8, 114.8, 114.9, 115.0, 119.5, 120.4, 121.6, 128.2, 132.7, 136.8, 144.8, 146.8, 147.4, 147.5, 147.5

MS *m/z*: 479 (M<sup>+</sup>)

Anal. calcd. for C<sub>28</sub>H<sub>33</sub>NO<sub>6</sub>: C, 70.13; H, 6.94; N, 2.92 %; Found C, 70.18; H, 6.98; N, 2.97%.

**4i. 8-(3-Chlorobenzylidene)-4-(3-chlorophenyl)-6-methyl-2,3,3a,5,6,7,8,9a-octa-hydro-4H-1,9-dioxo-6-aza-cyclopenta[b]naphthalene**

m.p. 167-168°C

<sup>1</sup>H-NMR (400 MHz): δ 1.81 (m, 2H, 3-CH<sub>2</sub>), 2.27 (s, 3H, NCH<sub>3</sub>), 2.56 (m, *J* = 4.0 Hz, 1H, 3a-CH), 3.03 (s, 4H, 5,7-CH<sub>2</sub>), 3.17 (d, *J* = 3.9 Hz, 1H, 4-CH), 3.75 (t, 2H, 2-CH<sub>2</sub>), 5.74 (s, *J* = 4.0 Hz, 1H, 9a-CH), 6.57 (s, 1H, =CH), 7.00-7.31 (m, 8H, Ar)

$^{13}\text{C}$ NMR (100 MHz):  $\delta$  22.7, 29.3, 39.9, 43.6, 53.8, 54.1, 60.5, 104.3, 104.8, 120.4, 124.3, 126.1, 126.4, 126.6, 128.1, 128.7, 129.7, 129.8, 133.6, 133.7, 136.3, 136.8, 140.8, 147.5

MS  $m/z$ : 427 ( $\text{M}^+$ )

Anal. calcd. for  $\text{C}_{24}\text{H}_{23}\text{Cl}_2\text{NO}_2$ : C, 66.77; H, 5.41; N, 3.27 %; Found C, 66.82; H, 5.46; N, 3.31%.

**4j. 8-(2-Chlorobenzylidene)-4-(2-chlorophenyl)-6-methyl-2,3,3a,5,6,7,8,9a-octa-hydro-4H-1,9-dioxo-6-aza-cyclopenta[b] naphthalene**

m.p. 213-214°C

$^1\text{H}$ -NMR (400 MHz):  $\delta$  1.81 (m, 2H, 3- $\text{CH}_2$ ), 2.27 (s, 3H,  $\text{NCH}_3$ ), 2.56 (m, 1H,  $J = 4.0$  Hz, 3a-CH), 3.03 (s, 4H, 5,7- $\text{CH}_2$ ), 3.17 (d,  $J = 3.9$  Hz, 1H, 4-CH), 3.75 (t, 2H, 2- $\text{CH}_2$ ), 5.74 (s,  $J = 3.9$  Hz, 1H, 9a-CH), 6.57 (s, 1H, =CH), 7.02-7.24 (m, 8H, Ar)

$^{13}\text{C}$ NMR (100 MHz):  $\delta$  20.7, 22.7, 39.9, 43.3, 53.8, 54.1, 60.5, 104.3, 104.8, 120.4, 126.4, 126.5, 127.1, 127.6, 128.6, 128.7, 129.1, 129.7, 131.5, 133.6, 135.3, 136.8, 139.8, 147.5

MS  $m/z$ : 427 ( $\text{M}^+$ )

Anal. calcd. for  $\text{C}_{24}\text{H}_{23}\text{Cl}_2\text{NO}_2$ : C, 67.29; H, 5.41; N, 3.27 %; Found C, 67.32; H, 5.47; N, 3.33 %.
